# Supplementary material for: Rapid Response and Cardiac Arrest Teams: A Descriptive Analysis of 103 American Hospitals
Source: PubMed Central journal article supplement — Crit Care Explor. 2019 Aug 7;1(8):e0031. doi: 10.1097/CCE.0000000000000031 (PMC7063949; doi:10.1097/cce.0000000000000031), 2019-08-07
Supplement: cc9-1-e0031-s001.pdf [file cc9-1-e0031-s001.pdf]

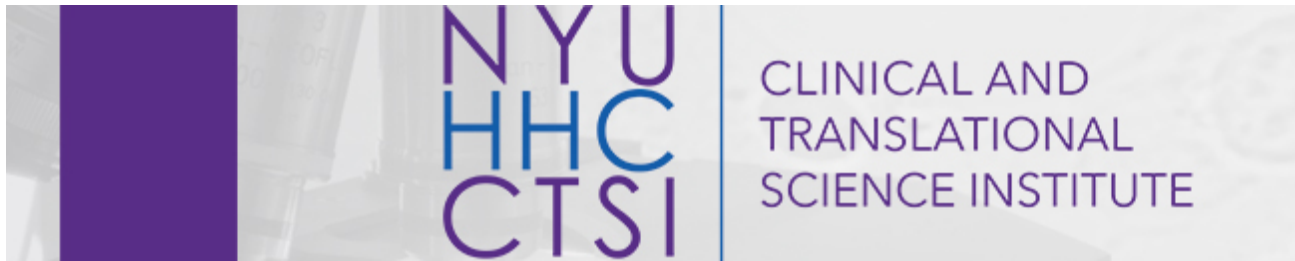

NYU Langone Health

## National Survey of Rapid Response Participants v3.0

[Codebook ▾](#)

### Data Dictionary Codebook

04/26/2019 5:06pm

| #                                                | Variable / Field Name       | Field Label<br><i>Field Note</i>                                                                     | Field Attributes (Field Type, Validation, Choices, Calculations, etc.)                                                                                                                                                                                                                                                                                                                                                                                                                                                                                                                        |   |                       |   |                            |   |                             |   |                      |   |                         |   |             |   |              |   |                     |   |                      |    |    |    |       |
|--------------------------------------------------|-----------------------------|------------------------------------------------------------------------------------------------------|-----------------------------------------------------------------------------------------------------------------------------------------------------------------------------------------------------------------------------------------------------------------------------------------------------------------------------------------------------------------------------------------------------------------------------------------------------------------------------------------------------------------------------------------------------------------------------------------------|---|-----------------------|---|----------------------------|---|-----------------------------|---|----------------------|---|-------------------------|---|-------------|---|--------------|---|---------------------|---|----------------------|----|----|----|-------|
| Instrument: <b>Hospital Info</b> (hospital_info) |                             |                                                                                                      |                                                                                                                                                                                                                                                                                                                                                                                                                                                                                                                                                                                               |   |                       |   |                            |   |                             |   |                      |   |                         |   |             |   |              |   |                     |   |                      |    |    |    |       |
| 1                                                | hospital_info               | Hospital ID                                                                                          | text, Identifier                                                                                                                                                                                                                                                                                                                                                                                                                                                                                                                                                                              |   |                       |   |                            |   |                             |   |                      |   |                         |   |             |   |              |   |                     |   |                      |    |    |    |       |
| 2                                                | name                        | Hospital Name:<br><i>This will not be published and will be used only to avoid duplicate entries</i> | text, Required, Identifier                                                                                                                                                                                                                                                                                                                                                                                                                                                                                                                                                                    |   |                       |   |                            |   |                             |   |                      |   |                         |   |             |   |              |   |                     |   |                      |    |    |    |       |
| 3                                                | affiliation                 | Hospital affiliation                                                                                 | radio, Required<br><table border="1"> <tr> <td>1</td> <td>University affiliated</td> </tr> <tr> <td>2</td> <td>Non-university affiliated</td> </tr> </table>                                                                                                                                                                                                                                                                                                                                                                                                                                  | 1 | University affiliated | 2 | Non-university affiliated  |   |                             |   |                      |   |                         |   |             |   |              |   |                     |   |                      |    |    |    |       |
| 1                                                | University affiliated       |                                                                                                      |                                                                                                                                                                                                                                                                                                                                                                                                                                                                                                                                                                                               |   |                       |   |                            |   |                             |   |                      |   |                         |   |             |   |              |   |                     |   |                      |    |    |    |       |
| 2                                                | Non-university affiliated   |                                                                                                      |                                                                                                                                                                                                                                                                                                                                                                                                                                                                                                                                                                                               |   |                       |   |                            |   |                             |   |                      |   |                         |   |             |   |              |   |                     |   |                      |    |    |    |       |
| 4                                                | state                       | State                                                                                                | text, Required                                                                                                                                                                                                                                                                                                                                                                                                                                                                                                                                                                                |   |                       |   |                            |   |                             |   |                      |   |                         |   |             |   |              |   |                     |   |                      |    |    |    |       |
| 5                                                | icubeds                     | Number of ICU beds in your hospital                                                                  | radio, Required<br><table border="1"> <tr> <td>0</td> <td>0</td> </tr> <tr> <td>1</td> <td>1-20</td> </tr> <tr> <td>2</td> <td>21-50</td> </tr> <tr> <td>3</td> <td>&gt;50</td> </tr> </table>                                                                                                                                                                                                                                                                                                                                                                                                | 0 | 0                     | 1 | 1-20                       | 2 | 21-50                       | 3 | >50                  |   |                         |   |             |   |              |   |                     |   |                      |    |    |    |       |
| 0                                                | 0                           |                                                                                                      |                                                                                                                                                                                                                                                                                                                                                                                                                                                                                                                                                                                               |   |                       |   |                            |   |                             |   |                      |   |                         |   |             |   |              |   |                     |   |                      |    |    |    |       |
| 1                                                | 1-20                        |                                                                                                      |                                                                                                                                                                                                                                                                                                                                                                                                                                                                                                                                                                                               |   |                       |   |                            |   |                             |   |                      |   |                         |   |             |   |              |   |                     |   |                      |    |    |    |       |
| 2                                                | 21-50                       |                                                                                                      |                                                                                                                                                                                                                                                                                                                                                                                                                                                                                                                                                                                               |   |                       |   |                            |   |                             |   |                      |   |                         |   |             |   |              |   |                     |   |                      |    |    |    |       |
| 3                                                | >50                         |                                                                                                      |                                                                                                                                                                                                                                                                                                                                                                                                                                                                                                                                                                                               |   |                       |   |                            |   |                             |   |                      |   |                         |   |             |   |              |   |                     |   |                      |    |    |    |       |
| 6                                                | admit                       | Who is usually responsible for deciding who gets admitted to the ICU?                                | dropdown, Required<br><table border="1"> <tr> <td>1</td> <td>NP/PA</td> </tr> <tr> <td>2</td> <td>Internal medicine resident</td> </tr> <tr> <td>3</td> <td>Internal medicine attending</td> </tr> <tr> <td>4</td> <td>Critical care fellow</td> </tr> <tr> <td>5</td> <td>Critical care attending</td> </tr> <tr> <td>6</td> <td>ED resident</td> </tr> <tr> <td>7</td> <td>ED attending</td> </tr> <tr> <td>8</td> <td>Anesthesia resident</td> </tr> <tr> <td>9</td> <td>Anesthesia attending</td> </tr> <tr> <td>11</td> <td>RN</td> </tr> <tr> <td>10</td> <td>Other</td> </tr> </table> | 1 | NP/PA                 | 2 | Internal medicine resident | 3 | Internal medicine attending | 4 | Critical care fellow | 5 | Critical care attending | 6 | ED resident | 7 | ED attending | 8 | Anesthesia resident | 9 | Anesthesia attending | 11 | RN | 10 | Other |
| 1                                                | NP/PA                       |                                                                                                      |                                                                                                                                                                                                                                                                                                                                                                                                                                                                                                                                                                                               |   |                       |   |                            |   |                             |   |                      |   |                         |   |             |   |              |   |                     |   |                      |    |    |    |       |
| 2                                                | Internal medicine resident  |                                                                                                      |                                                                                                                                                                                                                                                                                                                                                                                                                                                                                                                                                                                               |   |                       |   |                            |   |                             |   |                      |   |                         |   |             |   |              |   |                     |   |                      |    |    |    |       |
| 3                                                | Internal medicine attending |                                                                                                      |                                                                                                                                                                                                                                                                                                                                                                                                                                                                                                                                                                                               |   |                       |   |                            |   |                             |   |                      |   |                         |   |             |   |              |   |                     |   |                      |    |    |    |       |
| 4                                                | Critical care fellow        |                                                                                                      |                                                                                                                                                                                                                                                                                                                                                                                                                                                                                                                                                                                               |   |                       |   |                            |   |                             |   |                      |   |                         |   |             |   |              |   |                     |   |                      |    |    |    |       |
| 5                                                | Critical care attending     |                                                                                                      |                                                                                                                                                                                                                                                                                                                                                                                                                                                                                                                                                                                               |   |                       |   |                            |   |                             |   |                      |   |                         |   |             |   |              |   |                     |   |                      |    |    |    |       |
| 6                                                | ED resident                 |                                                                                                      |                                                                                                                                                                                                                                                                                                                                                                                                                                                                                                                                                                                               |   |                       |   |                            |   |                             |   |                      |   |                         |   |             |   |              |   |                     |   |                      |    |    |    |       |
| 7                                                | ED attending                |                                                                                                      |                                                                                                                                                                                                                                                                                                                                                                                                                                                                                                                                                                                               |   |                       |   |                            |   |                             |   |                      |   |                         |   |             |   |              |   |                     |   |                      |    |    |    |       |
| 8                                                | Anesthesia resident         |                                                                                                      |                                                                                                                                                                                                                                                                                                                                                                                                                                                                                                                                                                                               |   |                       |   |                            |   |                             |   |                      |   |                         |   |             |   |              |   |                     |   |                      |    |    |    |       |
| 9                                                | Anesthesia attending        |                                                                                                      |                                                                                                                                                                                                                                                                                                                                                                                                                                                                                                                                                                                               |   |                       |   |                            |   |                             |   |                      |   |                         |   |             |   |              |   |                     |   |                      |    |    |    |       |
| 11                                               | RN                          |                                                                                                      |                                                                                                                                                                                                                                                                                                                                                                                                                                                                                                                                                                                               |   |                       |   |                            |   |                             |   |                      |   |                         |   |             |   |              |   |                     |   |                      |    |    |    |       |
| 10                                               | Other                       |                                                                                                      |                                                                                                                                                                                                                                                                                                                                                                                                                                                                                                                                                                                               |   |                       |   |                            |   |                             |   |                      |   |                         |   |             |   |              |   |                     |   |                      |    |    |    |       |

|                                        |                                                                                   |                                                                                              |                                                                                                                        |
|----------------------------------------|-----------------------------------------------------------------------------------|----------------------------------------------------------------------------------------------|------------------------------------------------------------------------------------------------------------------------|
| 7                                      | admit_other<br>Show the field ONLY if:<br>[admit] = '10'                          | If other, please explain                                                                     | text, Required                                                                                                         |
| 8                                      | im                                                                                | ACGME Internal Medicine residency program?                                                   | yesno, Required<br>1 Yes<br>0 No                                                                                       |
| 9                                      | cc                                                                                | ACGME Critical Care fellowship program?                                                      | yesno, Required<br>1 Yes<br>0 No                                                                                       |
| 10                                     | anes                                                                              | ACGME Anesthesiology residency program?                                                      | yesno, Required<br>1 Yes<br>0 No                                                                                       |
| 11                                     | em_res                                                                            | ACGME Emergency Medicine Residency?                                                          | yesno, Required<br>1 Yes<br>0 No                                                                                       |
| 12                                     | hospital_info_complete                                                            | Section Header: <i>Form Status</i><br>Complete?                                              | dropdown<br>0 Incomplete<br>1 Unverified<br>2 Complete                                                                 |
| Instrument: <b>RRT Info</b> (rrt_info) |                                                                                   |                                                                                              |                                                                                                                        |
| 13                                     | rrt                                                                               | Does your hospital have a rapid response team (RRT)?                                         | yesno, Required<br>1 Yes<br>0 No                                                                                       |
| 14                                     | rrt_247<br>Show the field ONLY if:<br>[rrt] = '1'                                 | Is the RRT available 24 hours a day?                                                         | yesno, Required<br>1 Yes<br>0 No                                                                                       |
| 15                                     | rrt_call<br>Show the field ONLY if:<br>[rrt] = '1'                                | How are rapid response teams (RRT) called at your hospital?<br>(Multiple selections allowed) | checkbox, Required<br>1 rrt_call__1 Pager<br>2 rrt_call__2 Overhead call<br>3 rrt_call__3 Phone<br>4 rrt_call__4 Other |
| 16                                     | rrt_call_other<br>Show the field ONLY if:<br>[rrt] = '1' and [rrt_call (4)] = '1' | If other, how are RRTs called at your hospital?                                              | text, Required                                                                                                         |

|    |                                                                                                   |                                                                                             |                                                                                                                                                                                                                                                                                                                                                                                                                                                                                                                                                                                                                         |   |                  |                                      |                            |                  |                                               |   |                      |                  |                         |                  |                       |   |                     |   |                      |    |                               |    |                                |   |       |
|----|---------------------------------------------------------------------------------------------------|---------------------------------------------------------------------------------------------|-------------------------------------------------------------------------------------------------------------------------------------------------------------------------------------------------------------------------------------------------------------------------------------------------------------------------------------------------------------------------------------------------------------------------------------------------------------------------------------------------------------------------------------------------------------------------------------------------------------------------|---|------------------|--------------------------------------|----------------------------|------------------|-----------------------------------------------|---|----------------------|------------------|-------------------------|------------------|-----------------------|---|---------------------|---|----------------------|----|-------------------------------|----|--------------------------------|---|-------|
| 17 | <p>leader_rrt</p> <p>Show the field ONLY if:<br/>[rrt] = '1'</p>                                  | <p>Who is usually responsible for leading RRTs?</p>                                         | <p>dropdown, Required</p> <table border="1"> <tr><td>1</td><td>NP/PA</td></tr> <tr><td>2</td><td>Internal medicine resident</td></tr> <tr><td>3</td><td>Internal medicine attending</td></tr> <tr><td>4</td><td>Critical care fellow</td></tr> <tr><td>5</td><td>Critical care attending</td></tr> <tr><td>6</td><td>Critical care nursing</td></tr> <tr><td>7</td><td>Anesthesia resident</td></tr> <tr><td>8</td><td>Anesthesia attending</td></tr> <tr><td>10</td><td>Emergency department resident</td></tr> <tr><td>11</td><td>Emergency department attending</td></tr> <tr><td>9</td><td>Other</td></tr> </table> | 1 | NP/PA            | 2                                    | Internal medicine resident | 3                | Internal medicine attending                   | 4 | Critical care fellow | 5                | Critical care attending | 6                | Critical care nursing | 7 | Anesthesia resident | 8 | Anesthesia attending | 10 | Emergency department resident | 11 | Emergency department attending | 9 | Other |
| 1  | NP/PA                                                                                             |                                                                                             |                                                                                                                                                                                                                                                                                                                                                                                                                                                                                                                                                                                                                         |   |                  |                                      |                            |                  |                                               |   |                      |                  |                         |                  |                       |   |                     |   |                      |    |                               |    |                                |   |       |
| 2  | Internal medicine resident                                                                        |                                                                                             |                                                                                                                                                                                                                                                                                                                                                                                                                                                                                                                                                                                                                         |   |                  |                                      |                            |                  |                                               |   |                      |                  |                         |                  |                       |   |                     |   |                      |    |                               |    |                                |   |       |
| 3  | Internal medicine attending                                                                       |                                                                                             |                                                                                                                                                                                                                                                                                                                                                                                                                                                                                                                                                                                                                         |   |                  |                                      |                            |                  |                                               |   |                      |                  |                         |                  |                       |   |                     |   |                      |    |                               |    |                                |   |       |
| 4  | Critical care fellow                                                                              |                                                                                             |                                                                                                                                                                                                                                                                                                                                                                                                                                                                                                                                                                                                                         |   |                  |                                      |                            |                  |                                               |   |                      |                  |                         |                  |                       |   |                     |   |                      |    |                               |    |                                |   |       |
| 5  | Critical care attending                                                                           |                                                                                             |                                                                                                                                                                                                                                                                                                                                                                                                                                                                                                                                                                                                                         |   |                  |                                      |                            |                  |                                               |   |                      |                  |                         |                  |                       |   |                     |   |                      |    |                               |    |                                |   |       |
| 6  | Critical care nursing                                                                             |                                                                                             |                                                                                                                                                                                                                                                                                                                                                                                                                                                                                                                                                                                                                         |   |                  |                                      |                            |                  |                                               |   |                      |                  |                         |                  |                       |   |                     |   |                      |    |                               |    |                                |   |       |
| 7  | Anesthesia resident                                                                               |                                                                                             |                                                                                                                                                                                                                                                                                                                                                                                                                                                                                                                                                                                                                         |   |                  |                                      |                            |                  |                                               |   |                      |                  |                         |                  |                       |   |                     |   |                      |    |                               |    |                                |   |       |
| 8  | Anesthesia attending                                                                              |                                                                                             |                                                                                                                                                                                                                                                                                                                                                                                                                                                                                                                                                                                                                         |   |                  |                                      |                            |                  |                                               |   |                      |                  |                         |                  |                       |   |                     |   |                      |    |                               |    |                                |   |       |
| 10 | Emergency department resident                                                                     |                                                                                             |                                                                                                                                                                                                                                                                                                                                                                                                                                                                                                                                                                                                                         |   |                  |                                      |                            |                  |                                               |   |                      |                  |                         |                  |                       |   |                     |   |                      |    |                               |    |                                |   |       |
| 11 | Emergency department attending                                                                    |                                                                                             |                                                                                                                                                                                                                                                                                                                                                                                                                                                                                                                                                                                                                         |   |                  |                                      |                            |                  |                                               |   |                      |                  |                         |                  |                       |   |                     |   |                      |    |                               |    |                                |   |       |
| 9  | Other                                                                                             |                                                                                             |                                                                                                                                                                                                                                                                                                                                                                                                                                                                                                                                                                                                                         |   |                  |                                      |                            |                  |                                               |   |                      |                  |                         |                  |                       |   |                     |   |                      |    |                               |    |                                |   |       |
| 18 | <p>rrt_lead_other</p> <p>Show the field ONLY if:<br/>[rrt] = '1' and [leader_rrt] = '9'</p>       | <p>If other, who is usually responsible for leading RRTs at your hospital?</p>              | <p>text, Required</p>                                                                                                                                                                                                                                                                                                                                                                                                                                                                                                                                                                                                   |   |                  |                                      |                            |                  |                                               |   |                      |                  |                         |                  |                       |   |                     |   |                      |    |                               |    |                                |   |       |
| 19 | <p>rrt_parameter</p> <p>Show the field ONLY if:<br/>[rrt] = '1'</p>                               | <p>What parameters can result in an RRT being called?<br/>(Multiple selections allowed)</p> | <p>checkbox, Required</p> <table border="1"> <tr> <td>1</td> <td>rrt_parameter__1</td> <td>Early warning score (NEWS, MEWS etc)</td> </tr> <tr> <td>2</td> <td>rrt_parameter__2</td> <td>Single vital sign abnormality (eg HR, RR etc)</td> </tr> <tr> <td>3</td> <td>rrt_parameter__3</td> <td>Clinical concern</td> </tr> <tr> <td>4</td> <td>rrt_parameter__4</td> <td>Other</td> </tr> </table>                                                                                                                                                                                                                     | 1 | rrt_parameter__1 | Early warning score (NEWS, MEWS etc) | 2                          | rrt_parameter__2 | Single vital sign abnormality (eg HR, RR etc) | 3 | rrt_parameter__3     | Clinical concern | 4                       | rrt_parameter__4 | Other                 |   |                     |   |                      |    |                               |    |                                |   |       |
| 1  | rrt_parameter__1                                                                                  | Early warning score (NEWS, MEWS etc)                                                        |                                                                                                                                                                                                                                                                                                                                                                                                                                                                                                                                                                                                                         |   |                  |                                      |                            |                  |                                               |   |                      |                  |                         |                  |                       |   |                     |   |                      |    |                               |    |                                |   |       |
| 2  | rrt_parameter__2                                                                                  | Single vital sign abnormality (eg HR, RR etc)                                               |                                                                                                                                                                                                                                                                                                                                                                                                                                                                                                                                                                                                                         |   |                  |                                      |                            |                  |                                               |   |                      |                  |                         |                  |                       |   |                     |   |                      |    |                               |    |                                |   |       |
| 3  | rrt_parameter__3                                                                                  | Clinical concern                                                                            |                                                                                                                                                                                                                                                                                                                                                                                                                                                                                                                                                                                                                         |   |                  |                                      |                            |                  |                                               |   |                      |                  |                         |                  |                       |   |                     |   |                      |    |                               |    |                                |   |       |
| 4  | rrt_parameter__4                                                                                  | Other                                                                                       |                                                                                                                                                                                                                                                                                                                                                                                                                                                                                                                                                                                                                         |   |                  |                                      |                            |                  |                                               |   |                      |                  |                         |                  |                       |   |                     |   |                      |    |                               |    |                                |   |       |
| 20 | <p>rrt_para_other</p> <p>Show the field ONLY if:<br/>[rrt] = '1' and [rrt_parameter(4)] = '1'</p> | <p>If other, what parameters can result in an RRT being called at your hospital?</p>        | <p>text, Required</p>                                                                                                                                                                                                                                                                                                                                                                                                                                                                                                                                                                                                   |   |                  |                                      |                            |                  |                                               |   |                      |                  |                         |                  |                       |   |                     |   |                      |    |                               |    |                                |   |       |
| 21 | <p>rrt_variation</p> <p>Show the field ONLY if:<br/>[rrt] = '1'</p>                               | <p>Members of the RRT usually change:</p>                                                   | <p>radio</p> <table border="1"> <tr><td>1</td><td>Every day</td></tr> <tr><td>2</td><td>Every week</td></tr> <tr><td>3</td><td>Every month</td></tr> <tr><td>4</td><td>Rarely</td></tr> </table>                                                                                                                                                                                                                                                                                                                                                                                                                        | 1 | Every day        | 2                                    | Every week                 | 3                | Every month                                   | 4 | Rarely               |                  |                         |                  |                       |   |                     |   |                      |    |                               |    |                                |   |       |
| 1  | Every day                                                                                         |                                                                                             |                                                                                                                                                                                                                                                                                                                                                                                                                                                                                                                                                                                                                         |   |                  |                                      |                            |                  |                                               |   |                      |                  |                         |                  |                       |   |                     |   |                      |    |                               |    |                                |   |       |
| 2  | Every week                                                                                        |                                                                                             |                                                                                                                                                                                                                                                                                                                                                                                                                                                                                                                                                                                                                         |   |                  |                                      |                            |                  |                                               |   |                      |                  |                         |                  |                       |   |                     |   |                      |    |                               |    |                                |   |       |
| 3  | Every month                                                                                       |                                                                                             |                                                                                                                                                                                                                                                                                                                                                                                                                                                                                                                                                                                                                         |   |                  |                                      |                            |                  |                                               |   |                      |                  |                         |                  |                       |   |                     |   |                      |    |                               |    |                                |   |       |
| 4  | Rarely                                                                                            |                                                                                             |                                                                                                                                                                                                                                                                                                                                                                                                                                                                                                                                                                                                                         |   |                  |                                      |                            |                  |                                               |   |                      |                  |                         |                  |                       |   |                     |   |                      |    |                               |    |                                |   |       |
| 22 | <p>np_rrt</p> <p>Show the field ONLY if:<br/>[rrt] = '1'</p>                                      | <p>Section Header: <i>Who is a member of your RRT?</i><br/>Nurse Practitioner</p>           | <p>radio (Matrix), Required</p> <table border="1"> <tr><td>1</td><td>Always</td></tr> <tr><td>2</td><td>Sometimes</td></tr> <tr><td>3</td><td>Never</td></tr> </table>                                                                                                                                                                                                                                                                                                                                                                                                                                                  | 1 | Always           | 2                                    | Sometimes                  | 3                | Never                                         |   |                      |                  |                         |                  |                       |   |                     |   |                      |    |                               |    |                                |   |       |
| 1  | Always                                                                                            |                                                                                             |                                                                                                                                                                                                                                                                                                                                                                                                                                                                                                                                                                                                                         |   |                  |                                      |                            |                  |                                               |   |                      |                  |                         |                  |                       |   |                     |   |                      |    |                               |    |                                |   |       |
| 2  | Sometimes                                                                                         |                                                                                             |                                                                                                                                                                                                                                                                                                                                                                                                                                                                                                                                                                                                                         |   |                  |                                      |                            |                  |                                               |   |                      |                  |                         |                  |                       |   |                     |   |                      |    |                               |    |                                |   |       |
| 3  | Never                                                                                             |                                                                                             |                                                                                                                                                                                                                                                                                                                                                                                                                                                                                                                                                                                                                         |   |                  |                                      |                            |                  |                                               |   |                      |                  |                         |                  |                       |   |                     |   |                      |    |                               |    |                                |   |       |

|    |                                                       |                             |                                                                |
|----|-------------------------------------------------------|-----------------------------|----------------------------------------------------------------|
| 23 | pa_rrt<br>Show the field ONLY if:<br>[rrt] = '1'      | Physician Assistant         | radio (Matrix), Required<br>1 Always<br>2 Sometimes<br>3 Never |
| 24 | imres_rrt<br>Show the field ONLY if:<br>[rrt] = '1'   | Internal Medicine Resident  | radio (Matrix), Required<br>1 Always<br>2 Sometimes<br>3 Never |
| 25 | imatt_rrt<br>Show the field ONLY if:<br>[rrt] = '1'   | Internal Medicine Attending | radio (Matrix), Required<br>1 Always<br>2 Sometimes<br>3 Never |
| 26 | anesres_rrt<br>Show the field ONLY if:<br>[rrt] = '1' | Anesthesia Resident         | radio (Matrix), Required<br>1 Always<br>2 Sometimes<br>3 Never |
| 27 | anesatt_rrt<br>Show the field ONLY if:<br>[rrt] = '1' | Anesthesia Attending        | radio (Matrix), Required<br>1 Always<br>2 Sometimes<br>3 Never |
| 28 | em_res_rrt<br>Show the field ONLY if:<br>[rrt] = '1'  | EM Resident                 | radio (Matrix), Required<br>1 Always<br>2 Sometimes<br>3 Never |
| 29 | em_att_rrt<br>Show the field ONLY if:<br>[rrt] = '1'  | EM Attending                | radio (Matrix), Required<br>1 Always<br>2 Sometimes<br>3 Never |
| 30 | ccf_rrt<br>Show the field ONLY if:<br>[rrt] = '1'     | Critical Care Fellow        | radio (Matrix), Required<br>1 Always<br>2 Sometimes<br>3 Never |
| 31 | cca_rrt<br>Show the field ONLY if:<br>[rrt] = '1'     | Critical Care Attending     | radio (Matrix), Required<br>1 Always<br>2 Sometimes<br>3 Never |
| 32 | ccn_rrt<br>Show the field ONLY if:<br>[rrt] = '1'     | Critical Care Nurse         | radio (Matrix), Required<br>1 Always<br>2 Sometimes<br>3 Never |

|                                          |                                                                                      |                                                                                |                                                                                                                                                                                                                                                                                               |   |                |       |            |                |               |   |                |       |   |                |       |
|------------------------------------------|--------------------------------------------------------------------------------------|--------------------------------------------------------------------------------|-----------------------------------------------------------------------------------------------------------------------------------------------------------------------------------------------------------------------------------------------------------------------------------------------|---|----------------|-------|------------|----------------|---------------|---|----------------|-------|---|----------------|-------|
| 33                                       | nm_rrt<br>Show the field ONLY if:<br>[rrt] = '1'                                     | Nurse Manager                                                                  | radio (Matrix), Required<br><table border="1"> <tr><td>1</td><td>Always</td></tr> <tr><td>2</td><td>Sometimes</td></tr> <tr><td>3</td><td>Never</td></tr> </table>                                                                                                                            | 1 | Always         | 2     | Sometimes  | 3              | Never         |   |                |       |   |                |       |
| 1                                        | Always                                                                               |                                                                                |                                                                                                                                                                                                                                                                                               |   |                |       |            |                |               |   |                |       |   |                |       |
| 2                                        | Sometimes                                                                            |                                                                                |                                                                                                                                                                                                                                                                                               |   |                |       |            |                |               |   |                |       |   |                |       |
| 3                                        | Never                                                                                |                                                                                |                                                                                                                                                                                                                                                                                               |   |                |       |            |                |               |   |                |       |   |                |       |
| 34                                       | rt_rrt<br>Show the field ONLY if:<br>[rrt] = '1'                                     | Respiratory Therapist                                                          | radio (Matrix), Required<br><table border="1"> <tr><td>1</td><td>Always</td></tr> <tr><td>2</td><td>Sometimes</td></tr> <tr><td>3</td><td>Never</td></tr> </table>                                                                                                                            | 1 | Always         | 2     | Sometimes  | 3              | Never         |   |                |       |   |                |       |
| 1                                        | Always                                                                               |                                                                                |                                                                                                                                                                                                                                                                                               |   |                |       |            |                |               |   |                |       |   |                |       |
| 2                                        | Sometimes                                                                            |                                                                                |                                                                                                                                                                                                                                                                                               |   |                |       |            |                |               |   |                |       |   |                |       |
| 3                                        | Never                                                                                |                                                                                |                                                                                                                                                                                                                                                                                               |   |                |       |            |                |               |   |                |       |   |                |       |
| 35                                       | pharm_rrt<br>Show the field ONLY if:<br>[rrt] = '1'                                  | Pharmacist                                                                     | radio (Matrix), Required<br><table border="1"> <tr><td>1</td><td>Always</td></tr> <tr><td>2</td><td>Sometimes</td></tr> <tr><td>3</td><td>Never</td></tr> </table>                                                                                                                            | 1 | Always         | 2     | Sometimes  | 3              | Never         |   |                |       |   |                |       |
| 1                                        | Always                                                                               |                                                                                |                                                                                                                                                                                                                                                                                               |   |                |       |            |                |               |   |                |       |   |                |       |
| 2                                        | Sometimes                                                                            |                                                                                |                                                                                                                                                                                                                                                                                               |   |                |       |            |                |               |   |                |       |   |                |       |
| 3                                        | Never                                                                                |                                                                                |                                                                                                                                                                                                                                                                                               |   |                |       |            |                |               |   |                |       |   |                |       |
| 36                                       | rrt_other<br>Show the field ONLY if:<br>[rrt] = '1'                                  | Do other members of staff regularly attend RRTs? If so, please explain:        | notes                                                                                                                                                                                                                                                                                         |   |                |       |            |                |               |   |                |       |   |                |       |
| 37                                       | rrt_info_complete                                                                    | Section Header: <i>Form Status</i><br>Complete?                                | dropdown<br><table border="1"> <tr><td>0</td><td>Incomplete</td></tr> <tr><td>1</td><td>Unverified</td></tr> <tr><td>2</td><td>Complete</td></tr> </table>                                                                                                                                    | 0 | Incomplete     | 1     | Unverified | 2              | Complete      |   |                |       |   |                |       |
| 0                                        | Incomplete                                                                           |                                                                                |                                                                                                                                                                                                                                                                                               |   |                |       |            |                |               |   |                |       |   |                |       |
| 1                                        | Unverified                                                                           |                                                                                |                                                                                                                                                                                                                                                                                               |   |                |       |            |                |               |   |                |       |   |                |       |
| 2                                        | Complete                                                                             |                                                                                |                                                                                                                                                                                                                                                                                               |   |                |       |            |                |               |   |                |       |   |                |       |
| Instrument: <b>Code Info</b> (code_info) |                                                                                      |                                                                                |                                                                                                                                                                                                                                                                                               |   |                |       |            |                |               |   |                |       |   |                |       |
| 38                                       | cat                                                                                  | Does your hospital have a cardiac arrest team?                                 | yesno<br><table border="1"> <tr><td>1</td><td>Yes</td></tr> <tr><td>0</td><td>No</td></tr> </table>                                                                                                                                                                                           | 1 | Yes            | 0     | No         |                |               |   |                |       |   |                |       |
| 1                                        | Yes                                                                                  |                                                                                |                                                                                                                                                                                                                                                                                               |   |                |       |            |                |               |   |                |       |   |                |       |
| 0                                        | No                                                                                   |                                                                                |                                                                                                                                                                                                                                                                                               |   |                |       |            |                |               |   |                |       |   |                |       |
| 39                                       | code_callv1<br>Show the field ONLY if:<br>[cat] = '1'                                | How are cardiac arrests called at your hospital? (Multiple selections allowed) | checkbox, Required<br><table border="1"> <tr><td>1</td><td>code_callv1__1</td><td>Pager</td></tr> <tr><td>2</td><td>code_callv1__2</td><td>Overhead call</td></tr> <tr><td>3</td><td>code_callv1__3</td><td>Phone</td></tr> <tr><td>4</td><td>code_callv1__4</td><td>Other</td></tr> </table> | 1 | code_callv1__1 | Pager | 2          | code_callv1__2 | Overhead call | 3 | code_callv1__3 | Phone | 4 | code_callv1__4 | Other |
| 1                                        | code_callv1__1                                                                       | Pager                                                                          |                                                                                                                                                                                                                                                                                               |   |                |       |            |                |               |   |                |       |   |                |       |
| 2                                        | code_callv1__2                                                                       | Overhead call                                                                  |                                                                                                                                                                                                                                                                                               |   |                |       |            |                |               |   |                |       |   |                |       |
| 3                                        | code_callv1__3                                                                       | Phone                                                                          |                                                                                                                                                                                                                                                                                               |   |                |       |            |                |               |   |                |       |   |                |       |
| 4                                        | code_callv1__4                                                                       | Other                                                                          |                                                                                                                                                                                                                                                                                               |   |                |       |            |                |               |   |                |       |   |                |       |
| 40                                       | code_call_other<br>Show the field ONLY if:<br>[cat] = '1' and [code_callv1(4)] = '1' | If other, how are cardiac arrests called at your hospital?                     | text, Required                                                                                                                                                                                                                                                                                |   |                |       |            |                |               |   |                |       |   |                |       |

|    |                                                                                   |                                                                                 |                                                                                                                                                                                                                                                                                                                                                                                                                                                                                                                                                                                                                                                   |   |        |   |                            |   |                             |   |                      |   |                         |   |                       |   |                     |   |                      |    |                               |    |                                |   |       |
|----|-----------------------------------------------------------------------------------|---------------------------------------------------------------------------------|---------------------------------------------------------------------------------------------------------------------------------------------------------------------------------------------------------------------------------------------------------------------------------------------------------------------------------------------------------------------------------------------------------------------------------------------------------------------------------------------------------------------------------------------------------------------------------------------------------------------------------------------------|---|--------|---|----------------------------|---|-----------------------------|---|----------------------|---|-------------------------|---|-----------------------|---|---------------------|---|----------------------|----|-------------------------------|----|--------------------------------|---|-------|
| 41 | code_leadv1<br>Show the field ONLY if:<br>[cat] = '1'                             | Who is usually responsible for leading in-hospital cardiac arrests?             | dropdown, Required<br><table border="1" data-bbox="1049 117 1507 636"> <tr><td>1</td><td>NP/PA</td></tr> <tr><td>2</td><td>Internal medicine resident</td></tr> <tr><td>3</td><td>Internal medicine attending</td></tr> <tr><td>4</td><td>Critical care fellow</td></tr> <tr><td>5</td><td>Critical care attending</td></tr> <tr><td>6</td><td>Critical care nursing</td></tr> <tr><td>7</td><td>Anesthesia resident</td></tr> <tr><td>8</td><td>Anesthesia attending</td></tr> <tr><td>10</td><td>Emergency department resident</td></tr> <tr><td>11</td><td>Emergency department attending</td></tr> <tr><td>9</td><td>Other</td></tr> </table> | 1 | NP/PA  | 2 | Internal medicine resident | 3 | Internal medicine attending | 4 | Critical care fellow | 5 | Critical care attending | 6 | Critical care nursing | 7 | Anesthesia resident | 8 | Anesthesia attending | 10 | Emergency department resident | 11 | Emergency department attending | 9 | Other |
| 1  | NP/PA                                                                             |                                                                                 |                                                                                                                                                                                                                                                                                                                                                                                                                                                                                                                                                                                                                                                   |   |        |   |                            |   |                             |   |                      |   |                         |   |                       |   |                     |   |                      |    |                               |    |                                |   |       |
| 2  | Internal medicine resident                                                        |                                                                                 |                                                                                                                                                                                                                                                                                                                                                                                                                                                                                                                                                                                                                                                   |   |        |   |                            |   |                             |   |                      |   |                         |   |                       |   |                     |   |                      |    |                               |    |                                |   |       |
| 3  | Internal medicine attending                                                       |                                                                                 |                                                                                                                                                                                                                                                                                                                                                                                                                                                                                                                                                                                                                                                   |   |        |   |                            |   |                             |   |                      |   |                         |   |                       |   |                     |   |                      |    |                               |    |                                |   |       |
| 4  | Critical care fellow                                                              |                                                                                 |                                                                                                                                                                                                                                                                                                                                                                                                                                                                                                                                                                                                                                                   |   |        |   |                            |   |                             |   |                      |   |                         |   |                       |   |                     |   |                      |    |                               |    |                                |   |       |
| 5  | Critical care attending                                                           |                                                                                 |                                                                                                                                                                                                                                                                                                                                                                                                                                                                                                                                                                                                                                                   |   |        |   |                            |   |                             |   |                      |   |                         |   |                       |   |                     |   |                      |    |                               |    |                                |   |       |
| 6  | Critical care nursing                                                             |                                                                                 |                                                                                                                                                                                                                                                                                                                                                                                                                                                                                                                                                                                                                                                   |   |        |   |                            |   |                             |   |                      |   |                         |   |                       |   |                     |   |                      |    |                               |    |                                |   |       |
| 7  | Anesthesia resident                                                               |                                                                                 |                                                                                                                                                                                                                                                                                                                                                                                                                                                                                                                                                                                                                                                   |   |        |   |                            |   |                             |   |                      |   |                         |   |                       |   |                     |   |                      |    |                               |    |                                |   |       |
| 8  | Anesthesia attending                                                              |                                                                                 |                                                                                                                                                                                                                                                                                                                                                                                                                                                                                                                                                                                                                                                   |   |        |   |                            |   |                             |   |                      |   |                         |   |                       |   |                     |   |                      |    |                               |    |                                |   |       |
| 10 | Emergency department resident                                                     |                                                                                 |                                                                                                                                                                                                                                                                                                                                                                                                                                                                                                                                                                                                                                                   |   |        |   |                            |   |                             |   |                      |   |                         |   |                       |   |                     |   |                      |    |                               |    |                                |   |       |
| 11 | Emergency department attending                                                    |                                                                                 |                                                                                                                                                                                                                                                                                                                                                                                                                                                                                                                                                                                                                                                   |   |        |   |                            |   |                             |   |                      |   |                         |   |                       |   |                     |   |                      |    |                               |    |                                |   |       |
| 9  | Other                                                                             |                                                                                 |                                                                                                                                                                                                                                                                                                                                                                                                                                                                                                                                                                                                                                                   |   |        |   |                            |   |                             |   |                      |   |                         |   |                       |   |                     |   |                      |    |                               |    |                                |   |       |
| 42 | code_lead_other<br>Show the field ONLY if:<br>[cat] = '1' and [code_leadv1] = '9' | If other, who is responsible for leading cardiac arrests at your hospital?      | text, Required                                                                                                                                                                                                                                                                                                                                                                                                                                                                                                                                                                                                                                    |   |        |   |                            |   |                             |   |                      |   |                         |   |                       |   |                     |   |                      |    |                               |    |                                |   |       |
| 43 | identical                                                                         | Is your cardiac arrest team identical to your rapid response team?              | yesno, Required<br><table border="1" data-bbox="1049 873 1151 968"> <tr><td>1</td><td>Yes</td></tr> <tr><td>0</td><td>No</td></tr> </table>                                                                                                                                                                                                                                                                                                                                                                                                                                                                                                       | 1 | Yes    | 0 | No                         |   |                             |   |                      |   |                         |   |                       |   |                     |   |                      |    |                               |    |                                |   |       |
| 1  | Yes                                                                               |                                                                                 |                                                                                                                                                                                                                                                                                                                                                                                                                                                                                                                                                                                                                                                   |   |        |   |                            |   |                             |   |                      |   |                         |   |                       |   |                     |   |                      |    |                               |    |                                |   |       |
| 0  | No                                                                                |                                                                                 |                                                                                                                                                                                                                                                                                                                                                                                                                                                                                                                                                                                                                                                   |   |        |   |                            |   |                             |   |                      |   |                         |   |                       |   |                     |   |                      |    |                               |    |                                |   |       |
| 44 | np_code<br>Show the field ONLY if:<br>[identical] = '0'                           | Section Header: <i>Who is present at cardiac arrests?</i><br>Nurse Practitioner | radio (Matrix), Required<br><table border="1" data-bbox="1049 1016 1240 1157"> <tr><td>1</td><td>Always</td></tr> <tr><td>2</td><td>Sometimes</td></tr> <tr><td>3</td><td>Never</td></tr> </table>                                                                                                                                                                                                                                                                                                                                                                                                                                                | 1 | Always | 2 | Sometimes                  | 3 | Never                       |   |                      |   |                         |   |                       |   |                     |   |                      |    |                               |    |                                |   |       |
| 1  | Always                                                                            |                                                                                 |                                                                                                                                                                                                                                                                                                                                                                                                                                                                                                                                                                                                                                                   |   |        |   |                            |   |                             |   |                      |   |                         |   |                       |   |                     |   |                      |    |                               |    |                                |   |       |
| 2  | Sometimes                                                                         |                                                                                 |                                                                                                                                                                                                                                                                                                                                                                                                                                                                                                                                                                                                                                                   |   |        |   |                            |   |                             |   |                      |   |                         |   |                       |   |                     |   |                      |    |                               |    |                                |   |       |
| 3  | Never                                                                             |                                                                                 |                                                                                                                                                                                                                                                                                                                                                                                                                                                                                                                                                                                                                                                   |   |        |   |                            |   |                             |   |                      |   |                         |   |                       |   |                     |   |                      |    |                               |    |                                |   |       |
| 45 | pa_code<br>Show the field ONLY if:<br>[identical] = '0'                           | Physician Assistant                                                             | radio (Matrix), Required<br><table border="1" data-bbox="1049 1205 1240 1346"> <tr><td>1</td><td>Always</td></tr> <tr><td>2</td><td>Sometimes</td></tr> <tr><td>3</td><td>Never</td></tr> </table>                                                                                                                                                                                                                                                                                                                                                                                                                                                | 1 | Always | 2 | Sometimes                  | 3 | Never                       |   |                      |   |                         |   |                       |   |                     |   |                      |    |                               |    |                                |   |       |
| 1  | Always                                                                            |                                                                                 |                                                                                                                                                                                                                                                                                                                                                                                                                                                                                                                                                                                                                                                   |   |        |   |                            |   |                             |   |                      |   |                         |   |                       |   |                     |   |                      |    |                               |    |                                |   |       |
| 2  | Sometimes                                                                         |                                                                                 |                                                                                                                                                                                                                                                                                                                                                                                                                                                                                                                                                                                                                                                   |   |        |   |                            |   |                             |   |                      |   |                         |   |                       |   |                     |   |                      |    |                               |    |                                |   |       |
| 3  | Never                                                                             |                                                                                 |                                                                                                                                                                                                                                                                                                                                                                                                                                                                                                                                                                                                                                                   |   |        |   |                            |   |                             |   |                      |   |                         |   |                       |   |                     |   |                      |    |                               |    |                                |   |       |
| 46 | imres_code<br>Show the field ONLY if:<br>[identical] = '0'                        | Internal Medicine Resident                                                      | radio (Matrix), Required<br><table border="1" data-bbox="1049 1394 1240 1535"> <tr><td>1</td><td>Always</td></tr> <tr><td>2</td><td>Sometimes</td></tr> <tr><td>3</td><td>Never</td></tr> </table>                                                                                                                                                                                                                                                                                                                                                                                                                                                | 1 | Always | 2 | Sometimes                  | 3 | Never                       |   |                      |   |                         |   |                       |   |                     |   |                      |    |                               |    |                                |   |       |
| 1  | Always                                                                            |                                                                                 |                                                                                                                                                                                                                                                                                                                                                                                                                                                                                                                                                                                                                                                   |   |        |   |                            |   |                             |   |                      |   |                         |   |                       |   |                     |   |                      |    |                               |    |                                |   |       |
| 2  | Sometimes                                                                         |                                                                                 |                                                                                                                                                                                                                                                                                                                                                                                                                                                                                                                                                                                                                                                   |   |        |   |                            |   |                             |   |                      |   |                         |   |                       |   |                     |   |                      |    |                               |    |                                |   |       |
| 3  | Never                                                                             |                                                                                 |                                                                                                                                                                                                                                                                                                                                                                                                                                                                                                                                                                                                                                                   |   |        |   |                            |   |                             |   |                      |   |                         |   |                       |   |                     |   |                      |    |                               |    |                                |   |       |
| 47 | imatt_code<br>Show the field ONLY if:<br>[identical] = '0'                        | Internal Medicine Attending                                                     | radio (Matrix), Required<br><table border="1" data-bbox="1049 1583 1240 1724"> <tr><td>1</td><td>Always</td></tr> <tr><td>2</td><td>Sometimes</td></tr> <tr><td>3</td><td>Never</td></tr> </table>                                                                                                                                                                                                                                                                                                                                                                                                                                                | 1 | Always | 2 | Sometimes                  | 3 | Never                       |   |                      |   |                         |   |                       |   |                     |   |                      |    |                               |    |                                |   |       |
| 1  | Always                                                                            |                                                                                 |                                                                                                                                                                                                                                                                                                                                                                                                                                                                                                                                                                                                                                                   |   |        |   |                            |   |                             |   |                      |   |                         |   |                       |   |                     |   |                      |    |                               |    |                                |   |       |
| 2  | Sometimes                                                                         |                                                                                 |                                                                                                                                                                                                                                                                                                                                                                                                                                                                                                                                                                                                                                                   |   |        |   |                            |   |                             |   |                      |   |                         |   |                       |   |                     |   |                      |    |                               |    |                                |   |       |
| 3  | Never                                                                             |                                                                                 |                                                                                                                                                                                                                                                                                                                                                                                                                                                                                                                                                                                                                                                   |   |        |   |                            |   |                             |   |                      |   |                         |   |                       |   |                     |   |                      |    |                               |    |                                |   |       |
| 48 | anesres_code<br>Show the field ONLY if:<br>[identical] = '0'                      | Anesthesia Resident                                                             | radio (Matrix), Required<br><table border="1" data-bbox="1049 1772 1240 1913"> <tr><td>1</td><td>Always</td></tr> <tr><td>2</td><td>Sometimes</td></tr> <tr><td>3</td><td>Never</td></tr> </table>                                                                                                                                                                                                                                                                                                                                                                                                                                                | 1 | Always | 2 | Sometimes                  | 3 | Never                       |   |                      |   |                         |   |                       |   |                     |   |                      |    |                               |    |                                |   |       |
| 1  | Always                                                                            |                                                                                 |                                                                                                                                                                                                                                                                                                                                                                                                                                                                                                                                                                                                                                                   |   |        |   |                            |   |                             |   |                      |   |                         |   |                       |   |                     |   |                      |    |                               |    |                                |   |       |
| 2  | Sometimes                                                                         |                                                                                 |                                                                                                                                                                                                                                                                                                                                                                                                                                                                                                                                                                                                                                                   |   |        |   |                            |   |                             |   |                      |   |                         |   |                       |   |                     |   |                      |    |                               |    |                                |   |       |
| 3  | Never                                                                             |                                                                                 |                                                                                                                                                                                                                                                                                                                                                                                                                                                                                                                                                                                                                                                   |   |        |   |                            |   |                             |   |                      |   |                         |   |                       |   |                     |   |                      |    |                               |    |                                |   |       |

|    |                                                                             |                                                                                    |                                                                |
|----|-----------------------------------------------------------------------------|------------------------------------------------------------------------------------|----------------------------------------------------------------|
| 49 | anesatt_code<br>Show the field ONLY if:<br>[identical] = '0'                | Anesthesia Attending                                                               | radio (Matrix), Required<br>1 Always<br>2 Sometimes<br>3 Never |
| 50 | em_res_code<br>Show the field ONLY if:<br>[cat] = '1' and [identical] = '0' | EM Resident                                                                        | radio (Matrix), Required<br>1 Always<br>2 Sometimes<br>3 Never |
| 51 | em_att_code<br>Show the field ONLY if:<br>[cat] = '1' and [identical] = '0' | EM Attending                                                                       | radio (Matrix), Required<br>1 Always<br>2 Sometimes<br>3 Never |
| 52 | ccf_code<br>Show the field ONLY if:<br>[identical] = '0'                    | Critical Care Fellow                                                               | radio (Matrix), Required<br>1 Always<br>2 Sometimes<br>3 Never |
| 53 | cca_code<br>Show the field ONLY if:<br>[identical] = '0'                    | Critical Care Attending                                                            | radio (Matrix), Required<br>1 Always<br>2 Sometimes<br>3 Never |
| 54 | ccn_code<br>Show the field ONLY if:<br>[identical] = '0'                    | Critical Care Nurse                                                                | radio (Matrix), Required<br>1 Always<br>2 Sometimes<br>3 Never |
| 55 | nm_code<br>Show the field ONLY if:<br>[identical] = '0'                     | Nurse Manager                                                                      | radio (Matrix), Required<br>1 Always<br>2 Sometimes<br>3 Never |
| 56 | rt_code<br>Show the field ONLY if:<br>[identical] = '0'                     | Respiratory Therapist                                                              | radio (Matrix), Required<br>1 Always<br>2 Sometimes<br>3 Never |
| 57 | pharm_code<br>Show the field ONLY if:<br>[identical] = '0'                  | Pharmacist                                                                         | radio (Matrix), Required<br>1 Always<br>2 Sometimes<br>3 Never |
| 58 | code_other<br>Show the field ONLY if:<br>[identical] = '0'                  | Do other members of staff regularly attend cardiac arrests? If so, please explain: | notes, Required                                                |

|    |                                                                              |                                                                                                                                                         |                                                                                                                                                                                                                                                                                                                                                                                                                                                                                                                                                                                                                   |   |                     |     |                      |                     |        |   |                     |                                                   |             |                     |                      |   |                         |                                                                |       |                     |                  |   |                     |       |
|----|------------------------------------------------------------------------------|---------------------------------------------------------------------------------------------------------------------------------------------------------|-------------------------------------------------------------------------------------------------------------------------------------------------------------------------------------------------------------------------------------------------------------------------------------------------------------------------------------------------------------------------------------------------------------------------------------------------------------------------------------------------------------------------------------------------------------------------------------------------------------------|---|---------------------|-----|----------------------|---------------------|--------|---|---------------------|---------------------------------------------------|-------------|---------------------|----------------------|---|-------------------------|----------------------------------------------------------------|-------|---------------------|------------------|---|---------------------|-------|
| 59 | airway                                                                       | Who is responsible for airway management during cardiac arrests?                                                                                        | dropdown, Required <table border="1"> <tr><td>1</td><td>Anesthesia Resident</td></tr> <tr><td>3</td><td>Anesthesia Attending</td></tr> <tr><td>4</td><td>CRNA</td></tr> <tr><td>5</td><td>ED Attending</td></tr> <tr><td>6</td><td>ED Resident</td></tr> <tr><td>7</td><td>Critical Care Fellow</td></tr> <tr><td>8</td><td>Critical Care Attending</td></tr> <tr><td>9</td><td>Other</td></tr> </table>                                                                                                                                                                                                          | 1 | Anesthesia Resident | 3   | Anesthesia Attending | 4                   | CRNA   | 5 | ED Attending        | 6                                                 | ED Resident | 7                   | Critical Care Fellow | 8 | Critical Care Attending | 9                                                              | Other |                     |                  |   |                     |       |
| 1  | Anesthesia Resident                                                          |                                                                                                                                                         |                                                                                                                                                                                                                                                                                                                                                                                                                                                                                                                                                                                                                   |   |                     |     |                      |                     |        |   |                     |                                                   |             |                     |                      |   |                         |                                                                |       |                     |                  |   |                     |       |
| 3  | Anesthesia Attending                                                         |                                                                                                                                                         |                                                                                                                                                                                                                                                                                                                                                                                                                                                                                                                                                                                                                   |   |                     |     |                      |                     |        |   |                     |                                                   |             |                     |                      |   |                         |                                                                |       |                     |                  |   |                     |       |
| 4  | CRNA                                                                         |                                                                                                                                                         |                                                                                                                                                                                                                                                                                                                                                                                                                                                                                                                                                                                                                   |   |                     |     |                      |                     |        |   |                     |                                                   |             |                     |                      |   |                         |                                                                |       |                     |                  |   |                     |       |
| 5  | ED Attending                                                                 |                                                                                                                                                         |                                                                                                                                                                                                                                                                                                                                                                                                                                                                                                                                                                                                                   |   |                     |     |                      |                     |        |   |                     |                                                   |             |                     |                      |   |                         |                                                                |       |                     |                  |   |                     |       |
| 6  | ED Resident                                                                  |                                                                                                                                                         |                                                                                                                                                                                                                                                                                                                                                                                                                                                                                                                                                                                                                   |   |                     |     |                      |                     |        |   |                     |                                                   |             |                     |                      |   |                         |                                                                |       |                     |                  |   |                     |       |
| 7  | Critical Care Fellow                                                         |                                                                                                                                                         |                                                                                                                                                                                                                                                                                                                                                                                                                                                                                                                                                                                                                   |   |                     |     |                      |                     |        |   |                     |                                                   |             |                     |                      |   |                         |                                                                |       |                     |                  |   |                     |       |
| 8  | Critical Care Attending                                                      |                                                                                                                                                         |                                                                                                                                                                                                                                                                                                                                                                                                                                                                                                                                                                                                                   |   |                     |     |                      |                     |        |   |                     |                                                   |             |                     |                      |   |                         |                                                                |       |                     |                  |   |                     |       |
| 9  | Other                                                                        |                                                                                                                                                         |                                                                                                                                                                                                                                                                                                                                                                                                                                                                                                                                                                                                                   |   |                     |     |                      |                     |        |   |                     |                                                   |             |                     |                      |   |                         |                                                                |       |                     |                  |   |                     |       |
| 60 | airway_other<br>Show the field ONLY if:<br>[airway] = '9'                    | If other, who is responsible for airway management during cardiac arrests?                                                                              | text, Required                                                                                                                                                                                                                                                                                                                                                                                                                                                                                                                                                                                                    |   |                     |     |                      |                     |        |   |                     |                                                   |             |                     |                      |   |                         |                                                                |       |                     |                  |   |                     |       |
| 61 | airway_equipment                                                             | Select all of the following advanced airway equipment that are either brought to the arrest by the responding providers or available in the code carts: | checkbox, Required <table border="1"> <tr><td>1</td><td>airway_equipment__1</td><td>LMA</td></tr> <tr><td>2</td><td>airway_equipment__2</td><td>Bougie</td></tr> <tr><td>3</td><td>airway_equipment__3</td><td>Portable video laryngoscope (such as McGrath Mac)</td></tr> <tr><td>4</td><td>airway_equipment__4</td><td>Airtraq</td></tr> <tr><td>5</td><td>airway_equipment__5</td><td>Less portable video laryngoscope platforms (Glide Scope, Cmac)</td></tr> <tr><td>6</td><td>airway_equipment__6</td><td>Fiberoptic Scope</td></tr> <tr><td>7</td><td>airway_equipment__7</td><td>Other</td></tr> </table> | 1 | airway_equipment__1 | LMA | 2                    | airway_equipment__2 | Bougie | 3 | airway_equipment__3 | Portable video laryngoscope (such as McGrath Mac) | 4           | airway_equipment__4 | Airtraq              | 5 | airway_equipment__5     | Less portable video laryngoscope platforms (Glide Scope, Cmac) | 6     | airway_equipment__6 | Fiberoptic Scope | 7 | airway_equipment__7 | Other |
| 1  | airway_equipment__1                                                          | LMA                                                                                                                                                     |                                                                                                                                                                                                                                                                                                                                                                                                                                                                                                                                                                                                                   |   |                     |     |                      |                     |        |   |                     |                                                   |             |                     |                      |   |                         |                                                                |       |                     |                  |   |                     |       |
| 2  | airway_equipment__2                                                          | Bougie                                                                                                                                                  |                                                                                                                                                                                                                                                                                                                                                                                                                                                                                                                                                                                                                   |   |                     |     |                      |                     |        |   |                     |                                                   |             |                     |                      |   |                         |                                                                |       |                     |                  |   |                     |       |
| 3  | airway_equipment__3                                                          | Portable video laryngoscope (such as McGrath Mac)                                                                                                       |                                                                                                                                                                                                                                                                                                                                                                                                                                                                                                                                                                                                                   |   |                     |     |                      |                     |        |   |                     |                                                   |             |                     |                      |   |                         |                                                                |       |                     |                  |   |                     |       |
| 4  | airway_equipment__4                                                          | Airtraq                                                                                                                                                 |                                                                                                                                                                                                                                                                                                                                                                                                                                                                                                                                                                                                                   |   |                     |     |                      |                     |        |   |                     |                                                   |             |                     |                      |   |                         |                                                                |       |                     |                  |   |                     |       |
| 5  | airway_equipment__5                                                          | Less portable video laryngoscope platforms (Glide Scope, Cmac)                                                                                          |                                                                                                                                                                                                                                                                                                                                                                                                                                                                                                                                                                                                                   |   |                     |     |                      |                     |        |   |                     |                                                   |             |                     |                      |   |                         |                                                                |       |                     |                  |   |                     |       |
| 6  | airway_equipment__6                                                          | Fiberoptic Scope                                                                                                                                        |                                                                                                                                                                                                                                                                                                                                                                                                                                                                                                                                                                                                                   |   |                     |     |                      |                     |        |   |                     |                                                   |             |                     |                      |   |                         |                                                                |       |                     |                  |   |                     |       |
| 7  | airway_equipment__7                                                          | Other                                                                                                                                                   |                                                                                                                                                                                                                                                                                                                                                                                                                                                                                                                                                                                                                   |   |                     |     |                      |                     |        |   |                     |                                                   |             |                     |                      |   |                         |                                                                |       |                     |                  |   |                     |       |
| 62 | airway_tools_other<br>Show the field ONLY if:<br>[airway_equipment(7)] = '1' | If other, please specify:                                                                                                                               | text, Required                                                                                                                                                                                                                                                                                                                                                                                                                                                                                                                                                                                                    |   |                     |     |                      |                     |        |   |                     |                                                   |             |                     |                      |   |                         |                                                                |       |                     |                  |   |                     |       |
| 63 | attending_airway                                                             | Is there regular (100% of the time) Attending MD supervision of airway management during cardiac arrests?                                               | yesno, Required <table border="1"> <tr><td>1</td><td>Yes</td></tr> <tr><td>0</td><td>No</td></tr> </table>                                                                                                                                                                                                                                                                                                                                                                                                                                                                                                        | 1 | Yes                 | 0   | No                   |                     |        |   |                     |                                                   |             |                     |                      |   |                         |                                                                |       |                     |                  |   |                     |       |
| 1  | Yes                                                                          |                                                                                                                                                         |                                                                                                                                                                                                                                                                                                                                                                                                                                                                                                                                                                                                                   |   |                     |     |                      |                     |        |   |                     |                                                   |             |                     |                      |   |                         |                                                                |       |                     |                  |   |                     |       |
| 0  | No                                                                           |                                                                                                                                                         |                                                                                                                                                                                                                                                                                                                                                                                                                                                                                                                                                                                                                   |   |                     |     |                      |                     |        |   |                     |                                                   |             |                     |                      |   |                         |                                                                |       |                     |                  |   |                     |       |
| 64 | etco2                                                                        | Do you routinely use continuous waveform capnography (end tidal CO2) during cardiac arrest?                                                             | yesno, Required <table border="1"> <tr><td>1</td><td>Yes</td></tr> <tr><td>0</td><td>No</td></tr> </table>                                                                                                                                                                                                                                                                                                                                                                                                                                                                                                        | 1 | Yes                 | 0   | No                   |                     |        |   |                     |                                                   |             |                     |                      |   |                         |                                                                |       |                     |                  |   |                     |       |
| 1  | Yes                                                                          |                                                                                                                                                         |                                                                                                                                                                                                                                                                                                                                                                                                                                                                                                                                                                                                                   |   |                     |     |                      |                     |        |   |                     |                                                   |             |                     |                      |   |                         |                                                                |       |                     |                  |   |                     |       |
| 0  | No                                                                           |                                                                                                                                                         |                                                                                                                                                                                                                                                                                                                                                                                                                                                                                                                                                                                                                   |   |                     |     |                      |                     |        |   |                     |                                                   |             |                     |                      |   |                         |                                                                |       |                     |                  |   |                     |       |



|    |                                                                                      |                                                                                                    |                                                                                                                                                                                                                                                                                                                                                                                                      |   |                               |                                |                           |                  |                                                            |   |                                                                        |                                            |   |                  |       |
|----|--------------------------------------------------------------------------------------|----------------------------------------------------------------------------------------------------|------------------------------------------------------------------------------------------------------------------------------------------------------------------------------------------------------------------------------------------------------------------------------------------------------------------------------------------------------------------------------------------------------|---|-------------------------------|--------------------------------|---------------------------|------------------|------------------------------------------------------------|---|------------------------------------------------------------------------|--------------------------------------------|---|------------------|-------|
| 65 | mech_cpr                                                                             | Does your hospital use a mechanical CPR device?                                                    | yesno, Required<br><table border="1"> <tr> <td>1</td> <td>Yes</td> </tr> <tr> <td>0</td> <td>No</td> </tr> </table>                                                                                                                                                                                                                                                                                  | 1 | Yes                           | 0                              | No                        |                  |                                                            |   |                                                                        |                                            |   |                  |       |
| 1  | Yes                                                                                  |                                                                                                    |                                                                                                                                                                                                                                                                                                                                                                                                      |   |                               |                                |                           |                  |                                                            |   |                                                                        |                                            |   |                  |       |
| 0  | No                                                                                   |                                                                                                    |                                                                                                                                                                                                                                                                                                                                                                                                      |   |                               |                                |                           |                  |                                                            |   |                                                                        |                                            |   |                  |       |
| 66 | mech_cpr_device<br>Show the field ONLY if:<br>[mech_cpr] = '1'                       | Which device?                                                                                      | text, Required                                                                                                                                                                                                                                                                                                                                                                                       |   |                               |                                |                           |                  |                                                            |   |                                                                        |                                            |   |                  |       |
| 67 | when_mech_cpr<br>Show the field ONLY if:<br>[mech_cpr] = '1'                         | Please select the situations when a mechanical CPR device is used (multiple selections allowed):   | checkbox, Required<br><table border="1"> <tr> <td>1</td> <td>when_mech_cpr__1</td> <td>Out of hospital cardiac arrest</td> </tr> <tr> <td>2</td> <td>when_mech_cpr__2</td> <td>All in hospital cardiac arrest</td> </tr> <tr> <td>3</td> <td>when_mech_cpr__3</td> <td>Refractory in hospital cardiac arrest only</td> </tr> <tr> <td>4</td> <td>when_mech_cpr__4</td> <td>Other</td> </tr> </table> | 1 | when_mech_cpr__1              | Out of hospital cardiac arrest | 2                         | when_mech_cpr__2 | All in hospital cardiac arrest                             | 3 | when_mech_cpr__3                                                       | Refractory in hospital cardiac arrest only | 4 | when_mech_cpr__4 | Other |
| 1  | when_mech_cpr__1                                                                     | Out of hospital cardiac arrest                                                                     |                                                                                                                                                                                                                                                                                                                                                                                                      |   |                               |                                |                           |                  |                                                            |   |                                                                        |                                            |   |                  |       |
| 2  | when_mech_cpr__2                                                                     | All in hospital cardiac arrest                                                                     |                                                                                                                                                                                                                                                                                                                                                                                                      |   |                               |                                |                           |                  |                                                            |   |                                                                        |                                            |   |                  |       |
| 3  | when_mech_cpr__3                                                                     | Refractory in hospital cardiac arrest only                                                         |                                                                                                                                                                                                                                                                                                                                                                                                      |   |                               |                                |                           |                  |                                                            |   |                                                                        |                                            |   |                  |       |
| 4  | when_mech_cpr__4                                                                     | Other                                                                                              |                                                                                                                                                                                                                                                                                                                                                                                                      |   |                               |                                |                           |                  |                                                            |   |                                                                        |                                            |   |                  |       |
| 68 | mech_cpr_ind_other<br>Show the field ONLY if:<br>[when_mech_cpr(4)] = '1'            | If other, please specify:                                                                          | text, Required                                                                                                                                                                                                                                                                                                                                                                                       |   |                               |                                |                           |                  |                                                            |   |                                                                        |                                            |   |                  |       |
| 69 | ttm                                                                                  | Which best characterizes your practice of targeted temperature management for in hospital arrests? | radio, Required<br><table border="1"> <tr> <td>1</td> <td>Never for in hospital arrests</td> </tr> <tr> <td>2</td> <td>Only on VF/VT arrests.</td> </tr> <tr> <td>3</td> <td>On VF/VT and select PEA/asystole cases</td> </tr> <tr> <td>4</td> <td>On all arrests irrespective of rhythm if they meet neurologic criteria</td> </tr> </table>                                                        | 1 | Never for in hospital arrests | 2                              | Only on VF/VT arrests.    | 3                | On VF/VT and select PEA/asystole cases                     | 4 | On all arrests irrespective of rhythm if they meet neurologic criteria |                                            |   |                  |       |
| 1  | Never for in hospital arrests                                                        |                                                                                                    |                                                                                                                                                                                                                                                                                                                                                                                                      |   |                               |                                |                           |                  |                                                            |   |                                                                        |                                            |   |                  |       |
| 2  | Only on VF/VT arrests.                                                               |                                                                                                    |                                                                                                                                                                                                                                                                                                                                                                                                      |   |                               |                                |                           |                  |                                                            |   |                                                                        |                                            |   |                  |       |
| 3  | On VF/VT and select PEA/asystole cases                                               |                                                                                                    |                                                                                                                                                                                                                                                                                                                                                                                                      |   |                               |                                |                           |                  |                                                            |   |                                                                        |                                            |   |                  |       |
| 4  | On all arrests irrespective of rhythm if they meet neurologic criteria               |                                                                                                    |                                                                                                                                                                                                                                                                                                                                                                                                      |   |                               |                                |                           |                  |                                                            |   |                                                                        |                                            |   |                  |       |
| 70 | ttm_target<br>Show the field ONLY if:<br>[ttm] = '2' or [ttm] = '3' or [ttm] = '4'   | If you perform TTM, which temperature target do you use:                                           | radio, Required<br><table border="1"> <tr> <td>1</td> <td>Mild hypothermia : 33C-34C</td> </tr> <tr> <td>2</td> <td>Maintain normothermia 36C</td> </tr> <tr> <td>3</td> <td>Combination of a and b depending on the clinical situation</td> </tr> </table>                                                                                                                                          | 1 | Mild hypothermia : 33C-34C    | 2                              | Maintain normothermia 36C | 3                | Combination of a and b depending on the clinical situation |   |                                                                        |                                            |   |                  |       |
| 1  | Mild hypothermia : 33C-34C                                                           |                                                                                                    |                                                                                                                                                                                                                                                                                                                                                                                                      |   |                               |                                |                           |                  |                                                            |   |                                                                        |                                            |   |                  |       |
| 2  | Maintain normothermia 36C                                                            |                                                                                                    |                                                                                                                                                                                                                                                                                                                                                                                                      |   |                               |                                |                           |                  |                                                            |   |                                                                        |                                            |   |                  |       |
| 3  | Combination of a and b depending on the clinical situation                           |                                                                                                    |                                                                                                                                                                                                                                                                                                                                                                                                      |   |                               |                                |                           |                  |                                                            |   |                                                                        |                                            |   |                  |       |
| 71 | method_ttm<br>Show the field ONLY if:<br>[ttm] = '2' and [ttm] = '3' and [ttm] = '4' | If you perform TTM, which method of cooling do you use:                                            | checkbox, Required<br><table border="1"> <tr> <td>1</td> <td>method_ttm__1</td> <td>Surface</td> </tr> <tr> <td>2</td> <td>method_ttm__2</td> <td>Endovascular</td> </tr> <tr> <td>3</td> <td>method_ttm__3</td> <td>Other</td> </tr> </table>                                                                                                                                                       | 1 | method_ttm__1                 | Surface                        | 2                         | method_ttm__2    | Endovascular                                               | 3 | method_ttm__3                                                          | Other                                      |   |                  |       |
| 1  | method_ttm__1                                                                        | Surface                                                                                            |                                                                                                                                                                                                                                                                                                                                                                                                      |   |                               |                                |                           |                  |                                                            |   |                                                                        |                                            |   |                  |       |
| 2  | method_ttm__2                                                                        | Endovascular                                                                                       |                                                                                                                                                                                                                                                                                                                                                                                                      |   |                               |                                |                           |                  |                                                            |   |                                                                        |                                            |   |                  |       |
| 3  | method_ttm__3                                                                        | Other                                                                                              |                                                                                                                                                                                                                                                                                                                                                                                                      |   |                               |                                |                           |                  |                                                            |   |                                                                        |                                            |   |                  |       |
| 72 | ttm_method_other<br>Show the field ONLY if:<br>[method_ttm(3)] = '1'                 | If other, please specify:                                                                          | text, Required                                                                                                                                                                                                                                                                                                                                                                                       |   |                               |                                |                           |                  |                                                            |   |                                                                        |                                            |   |                  |       |

|    |                                                                                                                                    |                                                                                   |                                                                                                                                                                                                                                                                                                                                                                                                                                                                                                                                                                 |   |                                                                   |   |                                                                                                                                    |   |                                                                                       |   |                                                                                       |   |                                                   |    |       |
|----|------------------------------------------------------------------------------------------------------------------------------------|-----------------------------------------------------------------------------------|-----------------------------------------------------------------------------------------------------------------------------------------------------------------------------------------------------------------------------------------------------------------------------------------------------------------------------------------------------------------------------------------------------------------------------------------------------------------------------------------------------------------------------------------------------------------|---|-------------------------------------------------------------------|---|------------------------------------------------------------------------------------------------------------------------------------|---|---------------------------------------------------------------------------------------|---|---------------------------------------------------------------------------------------|---|---------------------------------------------------|----|-------|
| 73 | pci                                                                                                                                | Which patients go for emergent PCI (< 6 hours) after cardiac arrest?              | radio, Required<br><table border="1"> <tr> <td>5</td> <td>All VF/VT cardiac arrests, unless obvious alternative explanation</td> </tr> <tr> <td>6</td> <td>Most VF/VT cardiac arrests, regardless of EKG</td> </tr> <tr> <td>7</td> <td>Only VF/VT cardiac arrests with ST elevation after ROSC</td> </tr> <tr> <td>8</td> <td>VF/VT cardiac arrests with ST elevations post ROSC do not always undergo emergent PCI</td> </tr> <tr> <td>9</td> <td>VF/VT cardiac arrests rarely undergo emergent PCI</td> </tr> <tr> <td>10</td> <td>Other</td> </tr> </table> | 5 | All VF/VT cardiac arrests, unless obvious alternative explanation | 6 | Most VF/VT cardiac arrests, regardless of EKG                                                                                      | 7 | Only VF/VT cardiac arrests with ST elevation after ROSC                               | 8 | VF/VT cardiac arrests with ST elevations post ROSC do not always undergo emergent PCI | 9 | VF/VT cardiac arrests rarely undergo emergent PCI | 10 | Other |
| 5  | All VF/VT cardiac arrests, unless obvious alternative explanation                                                                  |                                                                                   |                                                                                                                                                                                                                                                                                                                                                                                                                                                                                                                                                                 |   |                                                                   |   |                                                                                                                                    |   |                                                                                       |   |                                                                                       |   |                                                   |    |       |
| 6  | Most VF/VT cardiac arrests, regardless of EKG                                                                                      |                                                                                   |                                                                                                                                                                                                                                                                                                                                                                                                                                                                                                                                                                 |   |                                                                   |   |                                                                                                                                    |   |                                                                                       |   |                                                                                       |   |                                                   |    |       |
| 7  | Only VF/VT cardiac arrests with ST elevation after ROSC                                                                            |                                                                                   |                                                                                                                                                                                                                                                                                                                                                                                                                                                                                                                                                                 |   |                                                                   |   |                                                                                                                                    |   |                                                                                       |   |                                                                                       |   |                                                   |    |       |
| 8  | VF/VT cardiac arrests with ST elevations post ROSC do not always undergo emergent PCI                                              |                                                                                   |                                                                                                                                                                                                                                                                                                                                                                                                                                                                                                                                                                 |   |                                                                   |   |                                                                                                                                    |   |                                                                                       |   |                                                                                       |   |                                                   |    |       |
| 9  | VF/VT cardiac arrests rarely undergo emergent PCI                                                                                  |                                                                                   |                                                                                                                                                                                                                                                                                                                                                                                                                                                                                                                                                                 |   |                                                                   |   |                                                                                                                                    |   |                                                                                       |   |                                                                                       |   |                                                   |    |       |
| 10 | Other                                                                                                                              |                                                                                   |                                                                                                                                                                                                                                                                                                                                                                                                                                                                                                                                                                 |   |                                                                   |   |                                                                                                                                    |   |                                                                                       |   |                                                                                       |   |                                                   |    |       |
| 74 | pci_other<br>Show the field ONLY if:<br>[pci] = '10'                                                                               | If other, please specify                                                          | text, Required                                                                                                                                                                                                                                                                                                                                                                                                                                                                                                                                                  |   |                                                                   |   |                                                                                                                                    |   |                                                                                       |   |                                                                                       |   |                                                   |    |       |
| 75 | ecpr                                                                                                                               | Do you have ECMO CPR (ECPR) available for in hospital arrests?                    | yesno, Required<br><table border="1"> <tr> <td>1</td> <td>Yes</td> </tr> <tr> <td>0</td> <td>No</td> </tr> </table>                                                                                                                                                                                                                                                                                                                                                                                                                                             | 1 | Yes                                                               | 0 | No                                                                                                                                 |   |                                                                                       |   |                                                                                       |   |                                                   |    |       |
| 1  | Yes                                                                                                                                |                                                                                   |                                                                                                                                                                                                                                                                                                                                                                                                                                                                                                                                                                 |   |                                                                   |   |                                                                                                                                    |   |                                                                                       |   |                                                                                       |   |                                                   |    |       |
| 0  | No                                                                                                                                 |                                                                                   |                                                                                                                                                                                                                                                                                                                                                                                                                                                                                                                                                                 |   |                                                                   |   |                                                                                                                                    |   |                                                                                       |   |                                                                                       |   |                                                   |    |       |
| 76 | ecpr_team<br>Show the field ONLY if:<br>[ecpr] = '1'                                                                               | ECMO CPR is available for in hospital arrests: (Please select one that fits best) | radio, Required<br><table border="1"> <tr> <td>1</td> <td>Rarely</td> </tr> <tr> <td>2</td> <td>ECPR can be done but only if resources happen to be available (eg. arrest occurs during daytime hours and all staff are available)</td> </tr> <tr> <td>3</td> <td>As part of a structured in hospital ECPR program that has a 24 hour on call ECMO team</td> </tr> </table>                                                                                                                                                                                     | 1 | Rarely                                                            | 2 | ECPR can be done but only if resources happen to be available (eg. arrest occurs during daytime hours and all staff are available) | 3 | As part of a structured in hospital ECPR program that has a 24 hour on call ECMO team |   |                                                                                       |   |                                                   |    |       |
| 1  | Rarely                                                                                                                             |                                                                                   |                                                                                                                                                                                                                                                                                                                                                                                                                                                                                                                                                                 |   |                                                                   |   |                                                                                                                                    |   |                                                                                       |   |                                                                                       |   |                                                   |    |       |
| 2  | ECPR can be done but only if resources happen to be available (eg. arrest occurs during daytime hours and all staff are available) |                                                                                   |                                                                                                                                                                                                                                                                                                                                                                                                                                                                                                                                                                 |   |                                                                   |   |                                                                                                                                    |   |                                                                                       |   |                                                                                       |   |                                                   |    |       |
| 3  | As part of a structured in hospital ECPR program that has a 24 hour on call ECMO team                                              |                                                                                   |                                                                                                                                                                                                                                                                                                                                                                                                                                                                                                                                                                 |   |                                                                   |   |                                                                                                                                    |   |                                                                                       |   |                                                                                       |   |                                                   |    |       |
| 77 | cann_ecmo<br>Show the field ONLY if:<br>[ecpr] = '1'                                                                               | Who performs cannulation for ECMO CPR?                                            | radio, Required<br><table border="1"> <tr> <td>1</td> <td>Critical Care</td> </tr> <tr> <td>2</td> <td>Cardiology</td> </tr> <tr> <td>3</td> <td>Cardiothoracic Surgery</td> </tr> <tr> <td>5</td> <td>Emergency Medicine</td> </tr> <tr> <td>4</td> <td>Other</td> </tr> </table>                                                                                                                                                                                                                                                                              | 1 | Critical Care                                                     | 2 | Cardiology                                                                                                                         | 3 | Cardiothoracic Surgery                                                                | 5 | Emergency Medicine                                                                    | 4 | Other                                             |    |       |
| 1  | Critical Care                                                                                                                      |                                                                                   |                                                                                                                                                                                                                                                                                                                                                                                                                                                                                                                                                                 |   |                                                                   |   |                                                                                                                                    |   |                                                                                       |   |                                                                                       |   |                                                   |    |       |
| 2  | Cardiology                                                                                                                         |                                                                                   |                                                                                                                                                                                                                                                                                                                                                                                                                                                                                                                                                                 |   |                                                                   |   |                                                                                                                                    |   |                                                                                       |   |                                                                                       |   |                                                   |    |       |
| 3  | Cardiothoracic Surgery                                                                                                             |                                                                                   |                                                                                                                                                                                                                                                                                                                                                                                                                                                                                                                                                                 |   |                                                                   |   |                                                                                                                                    |   |                                                                                       |   |                                                                                       |   |                                                   |    |       |
| 5  | Emergency Medicine                                                                                                                 |                                                                                   |                                                                                                                                                                                                                                                                                                                                                                                                                                                                                                                                                                 |   |                                                                   |   |                                                                                                                                    |   |                                                                                       |   |                                                                                       |   |                                                   |    |       |
| 4  | Other                                                                                                                              |                                                                                   |                                                                                                                                                                                                                                                                                                                                                                                                                                                                                                                                                                 |   |                                                                   |   |                                                                                                                                    |   |                                                                                       |   |                                                                                       |   |                                                   |    |       |
| 78 | cann_ecmo_other<br>Show the field ONLY if:<br>[cann_ecmo] = '4'                                                                    | If other, please specify:                                                         | text, Required                                                                                                                                                                                                                                                                                                                                                                                                                                                                                                                                                  |   |                                                                   |   |                                                                                                                                    |   |                                                                                       |   |                                                                                       |   |                                                   |    |       |
| 79 | io                                                                                                                                 | Do you place intraosseous lines during cardiac arrest?                            | yesno, Required<br><table border="1"> <tr> <td>1</td> <td>Yes</td> </tr> <tr> <td>0</td> <td>No</td> </tr> </table>                                                                                                                                                                                                                                                                                                                                                                                                                                             | 1 | Yes                                                               | 0 | No                                                                                                                                 |   |                                                                                       |   |                                                                                       |   |                                                   |    |       |
| 1  | Yes                                                                                                                                |                                                                                   |                                                                                                                                                                                                                                                                                                                                                                                                                                                                                                                                                                 |   |                                                                   |   |                                                                                                                                    |   |                                                                                       |   |                                                                                       |   |                                                   |    |       |
| 0  | No                                                                                                                                 |                                                                                   |                                                                                                                                                                                                                                                                                                                                                                                                                                                                                                                                                                 |   |                                                                   |   |                                                                                                                                    |   |                                                                                       |   |                                                                                       |   |                                                   |    |       |
| 80 | code_info_complete                                                                                                                 | Section Header: <i>Form Status</i><br>Complete?                                   | dropdown<br><table border="1"> <tr> <td>0</td> <td>Incomplete</td> </tr> <tr> <td>1</td> <td>Unverified</td> </tr> <tr> <td>2</td> <td>Complete</td> </tr> </table>                                                                                                                                                                                                                                                                                                                                                                                             | 0 | Incomplete                                                        | 1 | Unverified                                                                                                                         | 2 | Complete                                                                              |   |                                                                                       |   |                                                   |    |       |
| 0  | Incomplete                                                                                                                         |                                                                                   |                                                                                                                                                                                                                                                                                                                                                                                                                                                                                                                                                                 |   |                                                                   |   |                                                                                                                                    |   |                                                                                       |   |                                                                                       |   |                                                   |    |       |
| 1  | Unverified                                                                                                                         |                                                                                   |                                                                                                                                                                                                                                                                                                                                                                                                                                                                                                                                                                 |   |                                                                   |   |                                                                                                                                    |   |                                                                                       |   |                                                                                       |   |                                                   |    |       |
| 2  | Complete                                                                                                                           |                                                                                   |                                                                                                                                                                                                                                                                                                                                                                                                                                                                                                                                                                 |   |                                                                   |   |                                                                                                                                    |   |                                                                                       |   |                                                                                       |   |                                                   |    |       |
